# Supplementary material for: Efficient chemical structure and device engineering for achieving difluorinated 2,2′-bithiophene-based small molecular organic solar cells with 9.0% efficiency
Source: Royal Society of Chemistry journal article supplement (doi:10.1039/c8ta02699h), 2018-01-01
Supplement: c8ta02699h1.pdf [file c8ta02699h1.pdf]

## Supporting Information

### Efficiently Chemical Structure and Device Engineering for Achieving Difluorinated 2,2'-Bithiophene-Based Small Molecular Organic Solar Cells with 9.0% Efficiency

Min Li,<sup>a</sup> Zhongbin Qiu,<sup>a</sup> Guangjun Zhang,<sup>c</sup> Yu Liu,<sup>a,b\*</sup> Lin Xiong,<sup>a</sup>

Dan Bai,<sup>d</sup> Mengbing Zhu,<sup>b</sup> Qiang Peng,<sup>c\*</sup> Weiguo Zhu<sup>b\*</sup>

<sup>a</sup> *College of Chemistry, Key Lab of Environment-Friendly Chemistry and Application  
in the Ministry of Education, Xiangtan University, Xiangtan 411105, China.*

<sup>b</sup> *School of Materials Science and Engineering, Jiangsu Engineering Laboratory of  
Light-Electricity-Heat Energy-Converting Materials and Applications, Jiangsu  
Collaborative Innovation Center of Photovoltaic Science and Engineering, National  
Experimental Demonstration Center for Materials Science and Engineering,  
Changzhou University, Changzhou 213164, China*

<sup>c</sup> *Key Laboratory of Green Chemistry and Technology of Ministry of Education,  
College of Chemistry, and State Key Laboratory of Polymer Materials Engineering,  
Sichuan University, Chengdu 610065, China*

<sup>d</sup> *Department of Biochemistry and Molecular Biology, School of Medicine, Xi'an  
Jiaotong University Xi'an, Shaanxi Province 710061, China*

\*Email addresses:

(W, Z) zhuwig18@126.com

(Q. P) qiangpeng@scu.edu.cn

(Y. L) liuyu03b@126.com

# Contents

1. Characterization and Measurement.
2.  $^1\text{H}$  NMR,  $^{13}\text{C}$  NMR and MS Spectra.
3. Absorption spectra of SMs in a) dilute  $\text{CHCl}_3$  and b) in their blend films with  $\text{PC}_{71}\text{BM}$  at an optimized ratio of 1:1 (w/w), respectively.
4. Tauc plot of SMs to determine optical bandgap.
5. Fabrication and Characterization of Organic Solar Cells.
6. Photovoltaic properties of the  $\text{FBT}(\text{PyDPP-T})_2/\text{PC}_{71}\text{BM}$ -based OPV cells.
7. Photovoltaic properties of the  $\text{FBT}(\text{TDPP-T})_2/\text{PC}_{71}\text{BM}$ -based OPV cells.
8. Photovoltaic properties of the  $\text{FBT}(\text{IID-T})_2/\text{PC}_{71}\text{BM}$ -based OPV cells.

## 1. Characterization and Measurement

Nuclear magnetic resonance (NMR) spectra were recorded on a Bruker AV-400 spectrometer using tetramethylsilane (TMS) as a reference in deuterated chloroform solution at 298 K. Mass spectrometric measurements were performed on Bruker Biflex III MALDI-TOF. Thermogravimetric analyses (TGA) were conducted under a dry nitrogen gas flow at a heating rate of 20 °C min<sup>-1</sup> on a Perkin-Elmer TGA 7. Differential scan calorimetry (DSC) measurements were carried out with a Netzsch DSC-204 under N<sub>2</sub> flow at heating and cooling rates of 10 °C min<sup>-1</sup>. UV-Vis absorption spectra were recorded on a HP-8453 UV visible system. Cyclic voltammograms (CV) were carried out on a CHI660A electrochemical work station with a three electrode electrochemical cell in a 0.1 M tetrabutylammonium hexafluorophosphate (TBAPF<sub>6</sub>) acetonitrile solution with a scan 100 mV s<sup>-1</sup> at room temperature (RT) under argon atmosphere. In this three-electrode cell, a platinum rod, platinum wire and Ag/AgCl electrode were used as a working electrode, counter electrode and reference electrode, respectively. The surface morphology of the SMs:PC<sub>71</sub>BM blend film was investigated by an atomic force microscopy (AFM) on a Veeco, DI multimode NS-3D apparatus in a tapping mode under normal air condition at RT with a 5 μm scanner. The HOMO and LUMO distributions of SMs were calculated by the density functional theory (DFT) (B3LYP; 6-31G\*) method.

## 2. $^1\text{H}$ NMR and $^{13}\text{C}$ NMR Spectra

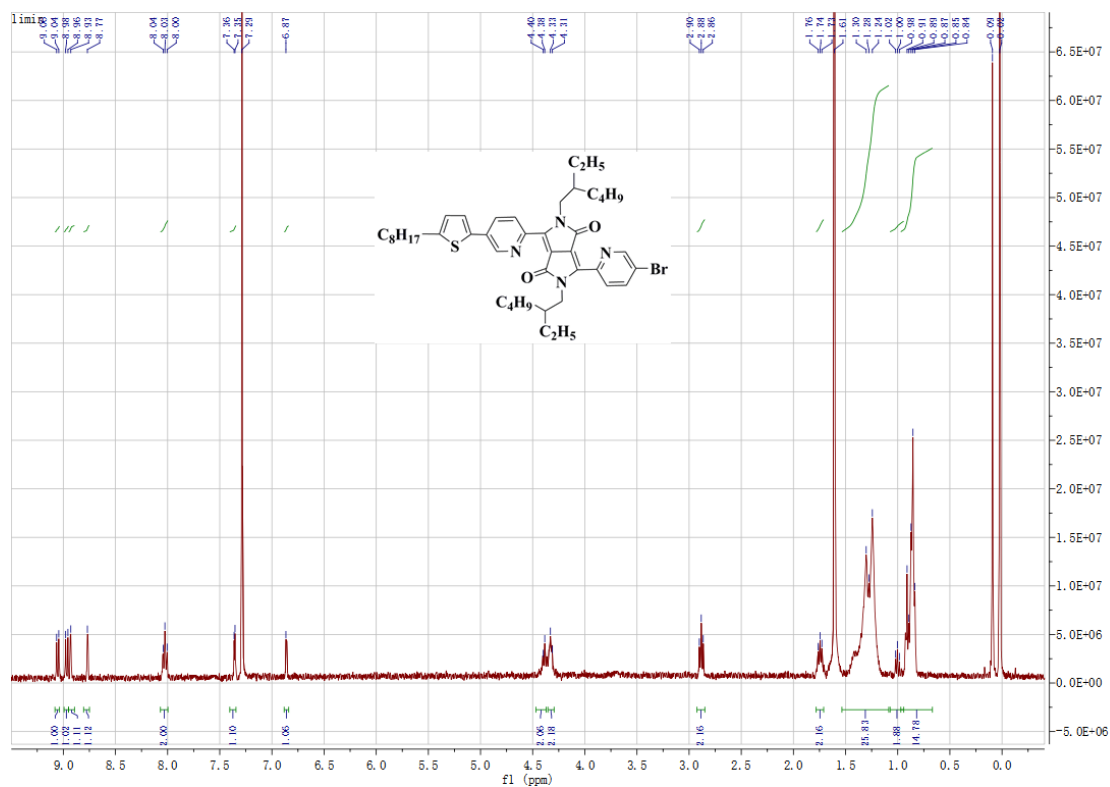

**Fig.S1.**  $^1\text{H}$  NMR spectrum of BrPyDPP-TR<sub>1</sub>

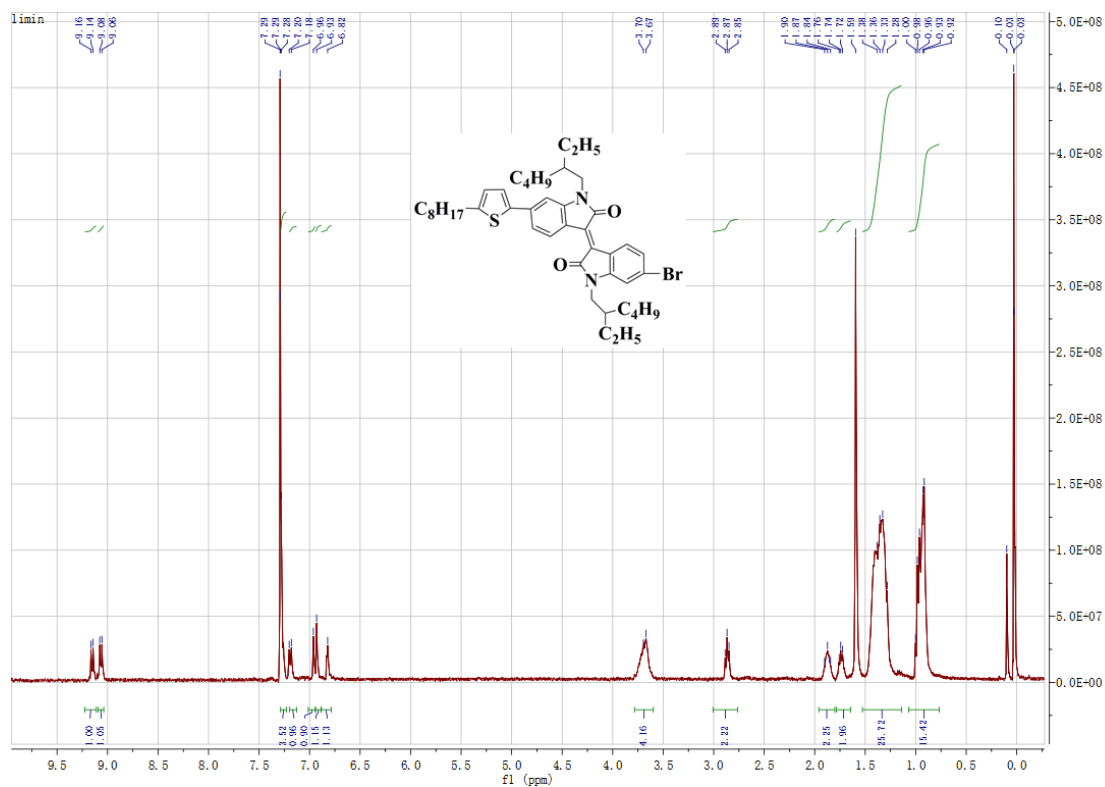

**Fig. S2.**  $^1\text{H}$  NMR spectrum of BrIID-TR<sub>1</sub>

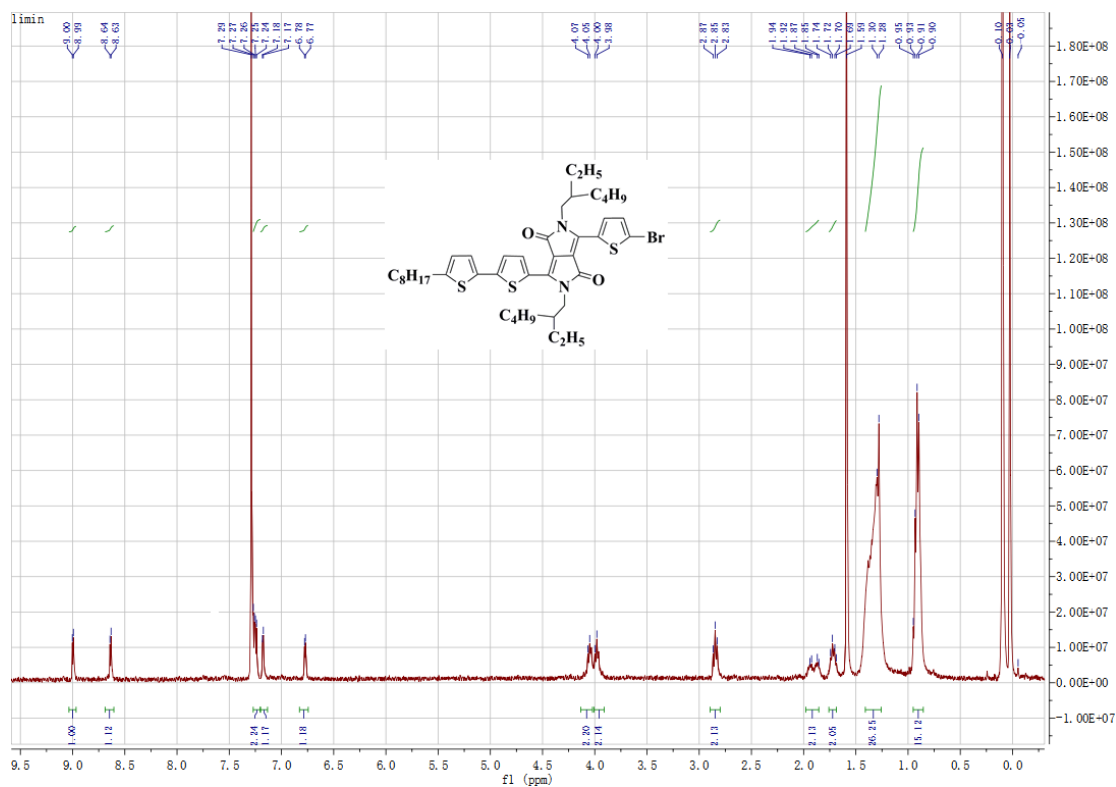

Fig.S3.  $^1\text{H}$  NMR spectrum of BrTDPP-TR<sub>1</sub>

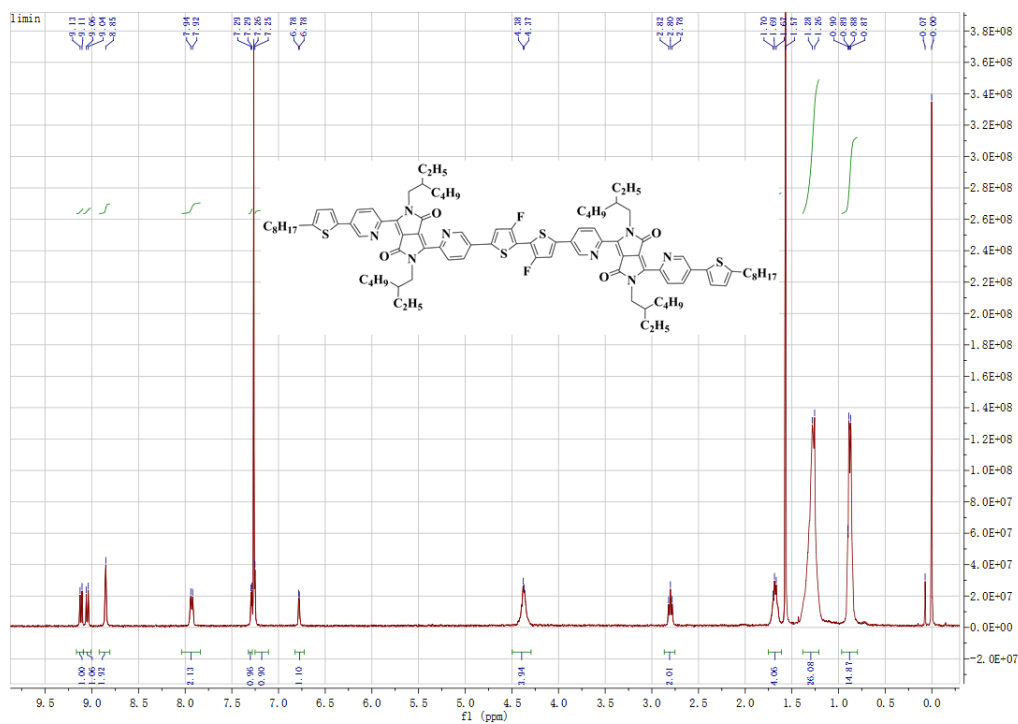

Fig. S4  $^1\text{H}$ -NMR spectrum of FBT(PyDPP-T)<sub>2</sub>

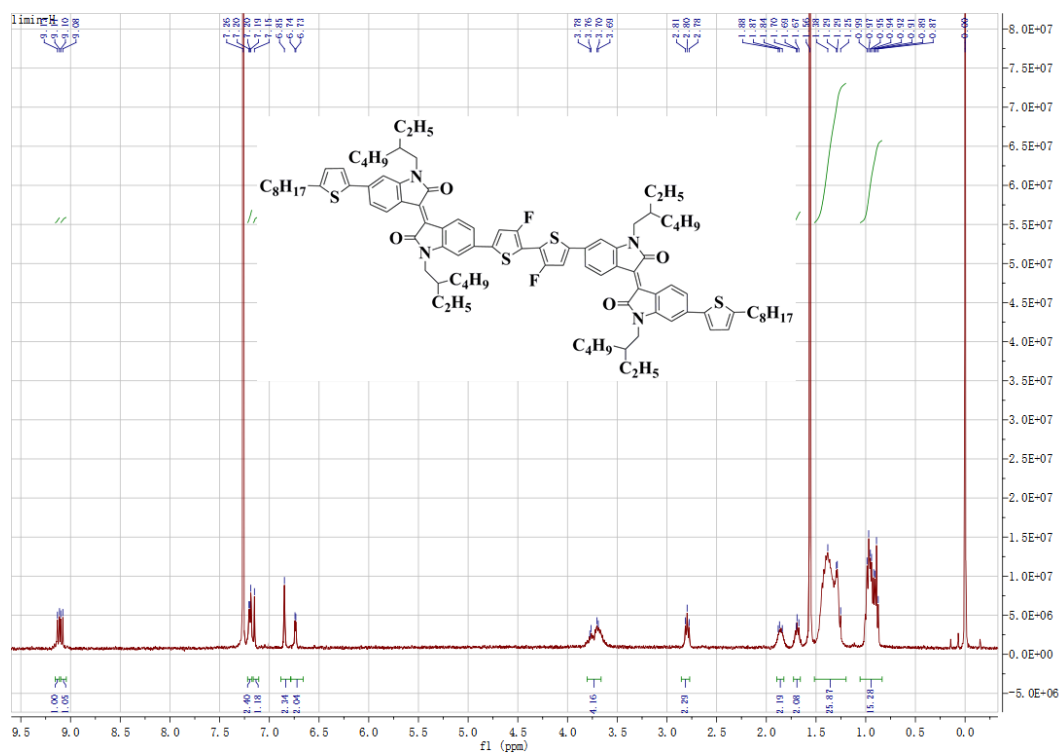

Fig. S5. <sup>1</sup>H-NMR spectrum of FBT(TDPP-T)<sub>2</sub>

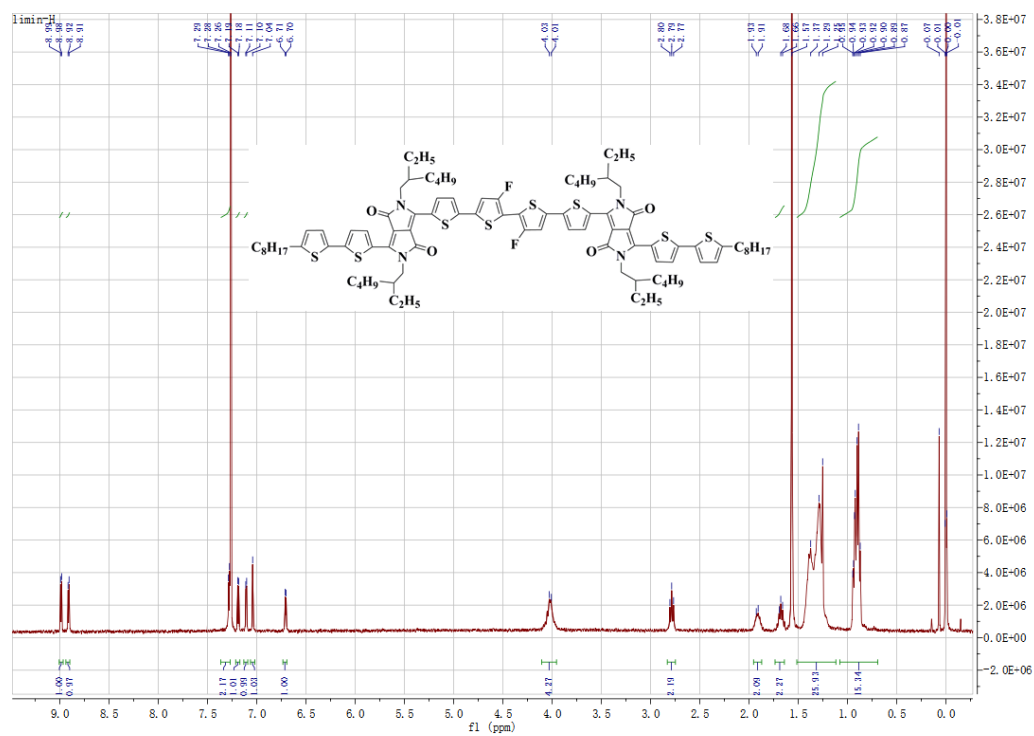

Fig. S6. <sup>1</sup>H-NMR spectrum of FBT(IID-T)<sub>2</sub>

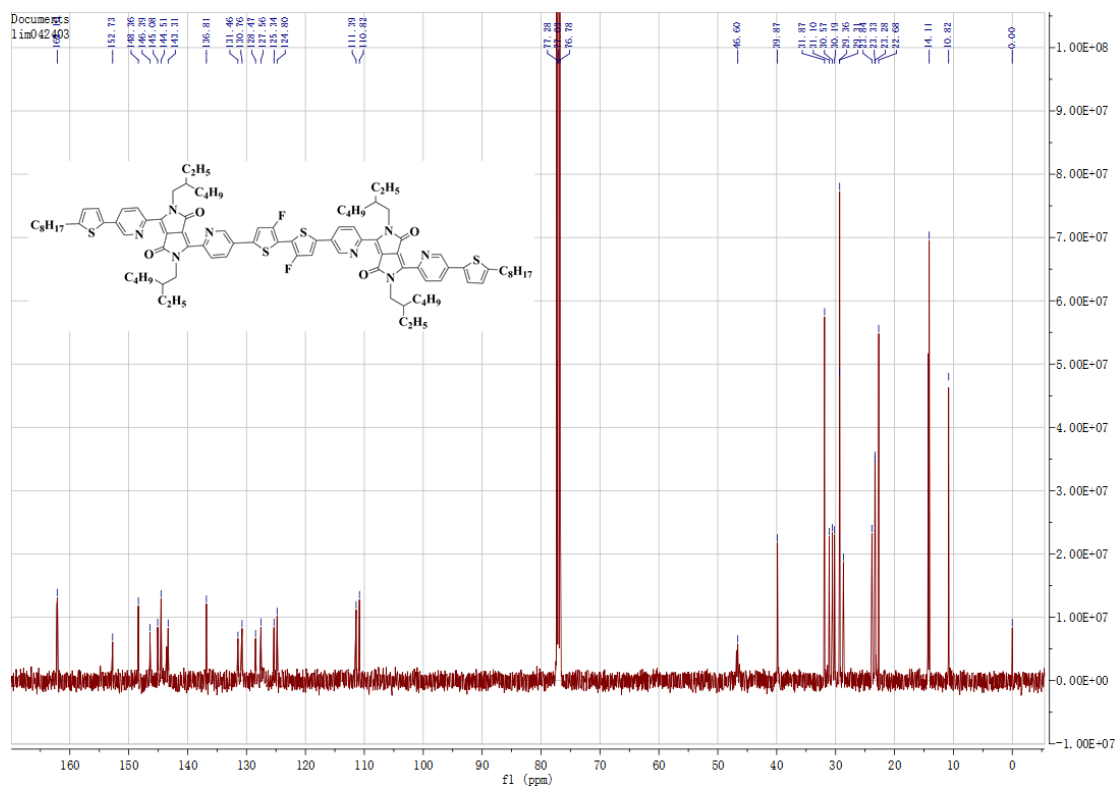

**Fig. S7.** <sup>13</sup>C-NMR spectrum of FBT(PyDPP-T)<sub>2</sub>

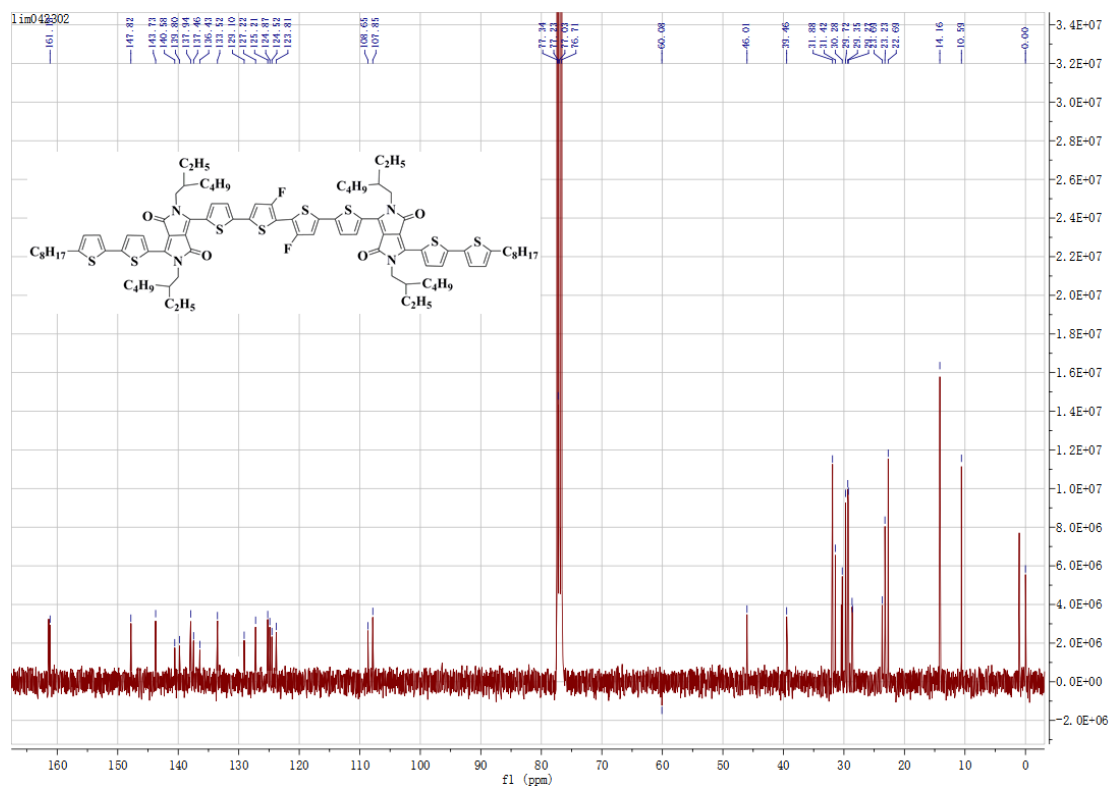



**Fig. S8.**  $^{13}\text{C}$ -NMR spectrum of FBT(TDPP-T)<sub>2</sub>

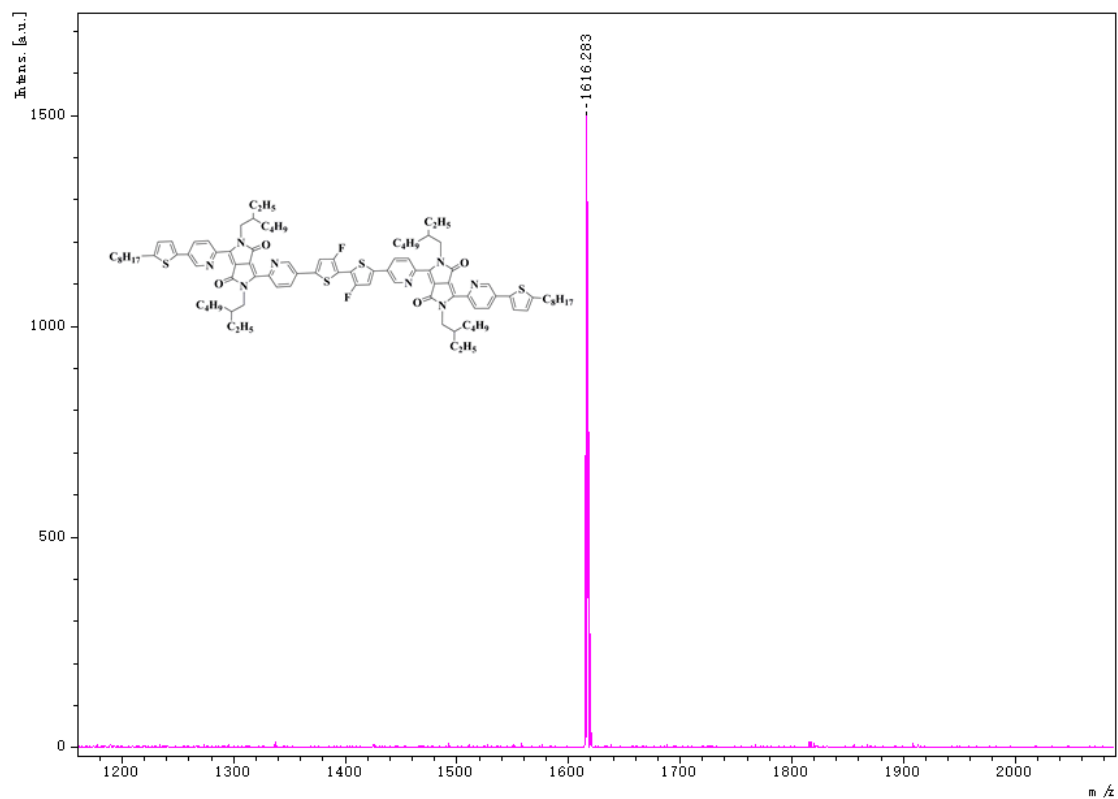

**Fig. S9.** MS spectrum of FBT(PyDPP-T)<sub>2</sub>

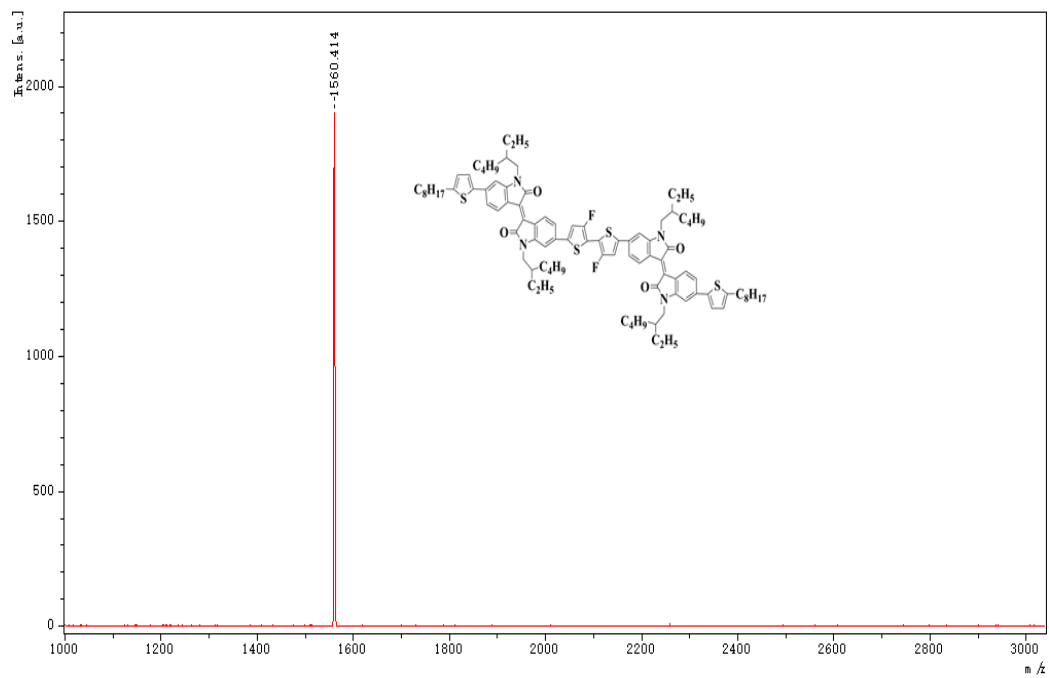

**Fig.S10.** MS spectrum of FBT(IID-T)<sub>2</sub>

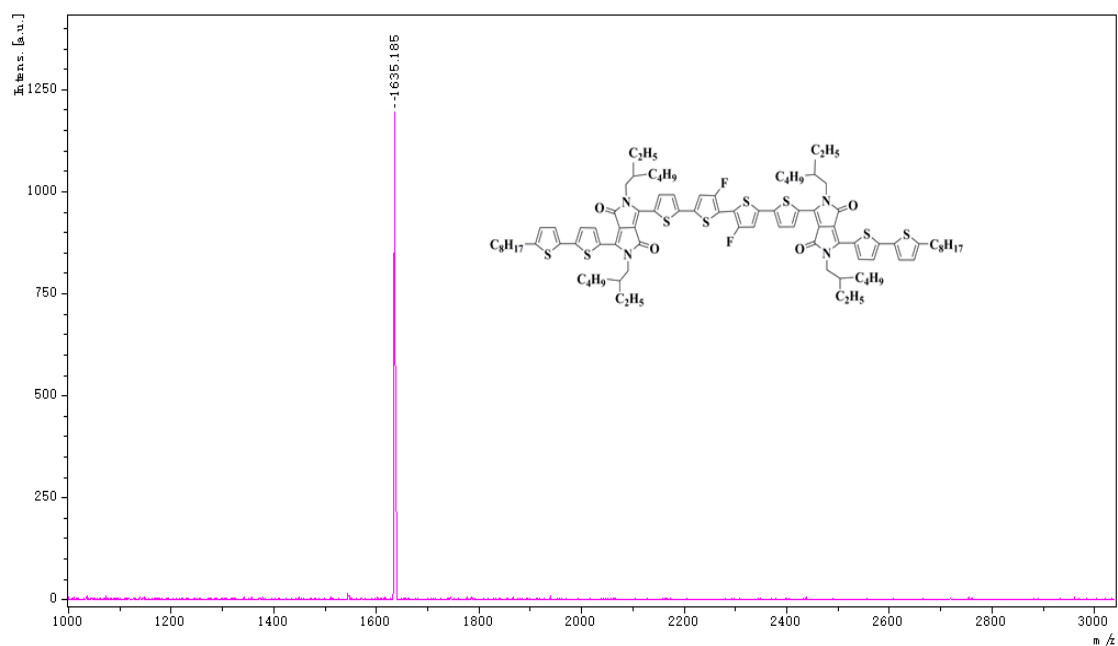

**Fig. S11.** MS spectrum of FBT(TDPP-T)<sub>2</sub>

### 3. The absorption molar coefficient in different conditions.

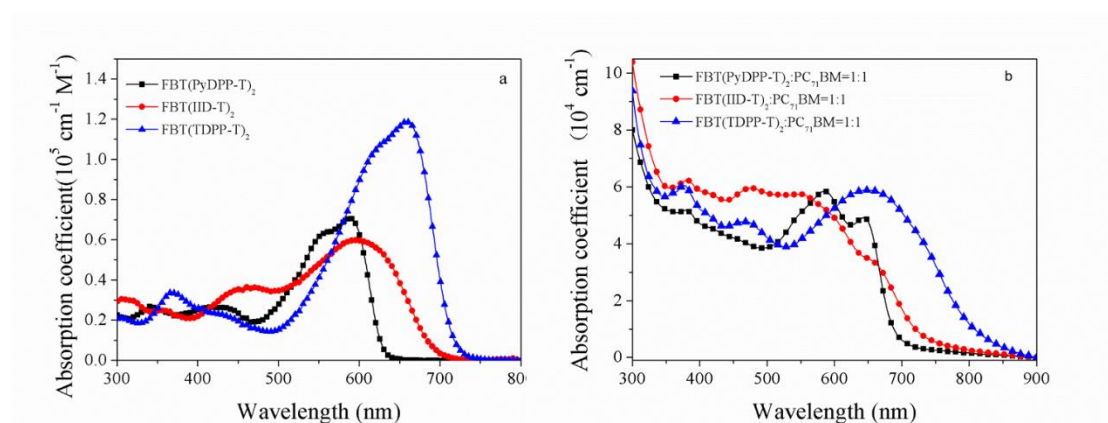

**Fig.S12.** Absorption spectra of SMs in a) dilute CHCl<sub>3</sub> and b) in their blend films with PC<sub>71</sub>BM at an optimized ratio of 1:1 (w/w), respectively.

#### 4. Tauc plot of SMs to determine optical bandgap.

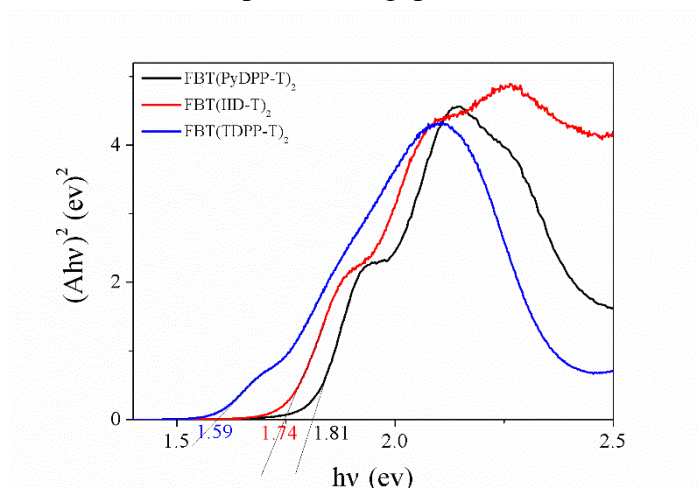

Fig.S13. Tauc plot of SMs to determine optical bandgap, from the equation of the related band gap  $E_g^{opt}$  and absorbance  $A$ :  $(Ahv)^2 = B(hv - E_g^{opt})$ .

#### 5. Fabrication and Characterization of Organic Solar Cells

A sandwich structure of: ITO/PEDOT:PSS(5000 rpm, 140 °C 30min)/SM:PC<sub>71</sub>BM (2000 rpm)/Ca (10 nm)/Al (100 nm), was used in the solar cells. The photosensitive layer was subsequently prepared by spin-coating rate of 2000 rpm with a solution of the SM/PC<sub>71</sub>BM (1:1, w/w) at room temperature in chloroform (CF) with 0.4% CN (CN/CF, v/v) on the PEDOT:PSS layer with a typical concentration of 10 mg mL<sup>-1</sup>, followed by CS<sub>2</sub>-SVA treatment for 20 s. Ca (10 nm) and Al (100 nm) were successively deposited on the photosensitive layer in vacuum and used as top electrodes. The current-voltage ( $I$ - $V$ ) characterization of the devices was carried out on a computer-controlled Keithley source measurement system. A solar simulator was used as the light source and the light intensity was monitored by a standard Si solar cell. The active area was 0.1 cm<sup>2</sup> for each cell. The thicknesses of the spun-cast films were recorded by a profilometer (Alpha-Step 200, Tencor Instruments). The external quantum efficiency ( $EQE$ ) was measured with a Stanford Research Systems model SR830 DSP lock-in amplifier coupled with WDG3 monochromator and a 150 W xenon lamp.

## 6. Photovoltaic properties of the FBT(PyDPP-T)<sub>2</sub>/PC<sub>71</sub>BM-based OPV cells.

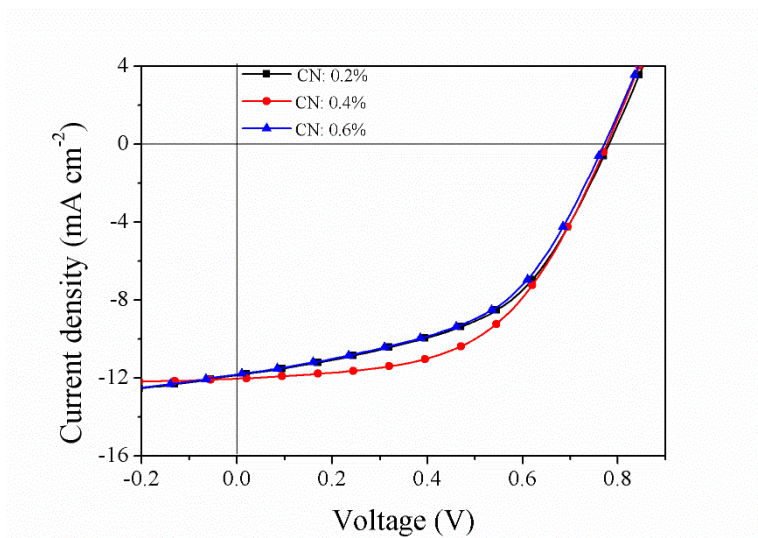

**Fig. S14.** *J*-*V* curve of the FBT(PyDPP-T)<sub>2</sub>/PC<sub>71</sub>BM-based OSCs under AM.1.5G illumination (100 mW/cm<sup>2</sup>) with SM/PC<sub>71</sub>BM CN ratios optimization.

**Table S1.** Photovoltaic parameters of the FBT(PyDPP-T)<sub>2</sub>/PC<sub>71</sub>BM-based PSCs under AM.1.5G illumination (100 mW/cm<sup>2</sup>) with SM/PC<sub>71</sub>BM CN ratios optimization.

| CN   | $V_{oc}$ (V) | $J_{sc}$ (mA/cm <sup>2</sup> ) | FF (%) | PCE (%)    |
|------|--------------|--------------------------------|--------|------------|
| 0.2% | 0.77         | 11.85                          | 50.92  | 4.65(4.31) |
| 0.4% | 0.77         | 12.03                          | 54.46  | 5.04(4.89) |
| 0.6% | 0.76         | 11.79                          | 50.89  | 4.56(4.32) |

Device condition:

- (1) chloroform(CF);
- (2) concentration: 10 mg/mL of FBT(PyDPP-T)<sub>2</sub> in CF;
- (3) Structure: ITO/PEDOT:PSS(5000 rpm, 140 °C 30min)/SM1:PC71BM (2000 rpm)/Ca (10 nm)/Al (100 nm).
- (4) Spin-coating temperature: at room temperature.

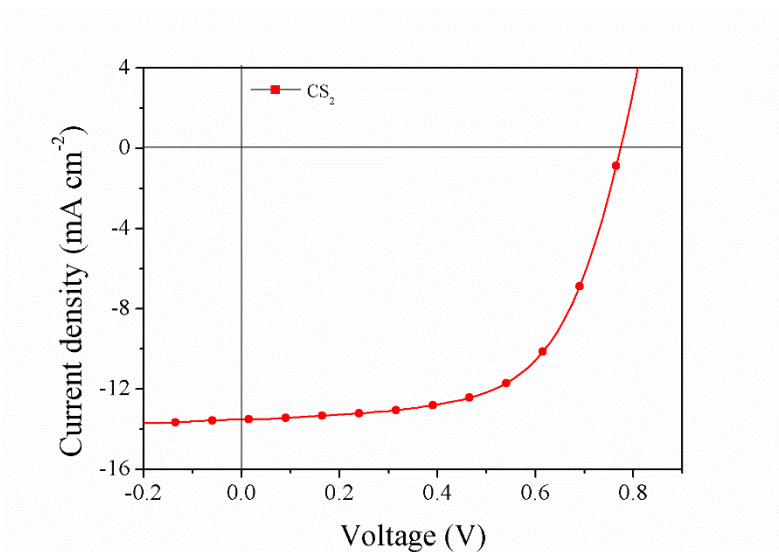

**Fig. S15.** *J-V* curve of the FBT(PyDPP-T)<sub>2</sub>/PC<sub>71</sub>BM-based SM-OSCs under AM.1.5G illumination (100 mW/cm<sup>2</sup>) with CS<sub>2</sub> solvent annealing.

**Table. S2.** *J-V* curve of the FBT(PyDPP-T)<sub>2</sub>/PC<sub>71</sub>BM-based SM-OSCs under AM.1.5G illumination (100 mW/cm<sup>2</sup>) with CS<sub>2</sub> solvent annealing.

| Solvent         | $V_{oc}$ (V) | $J_{sc}$ (mA/cm <sup>2</sup> ) | FF (%) | PCE (%)    |
|-----------------|--------------|--------------------------------|--------|------------|
| CS <sub>2</sub> | 0.765        | 13.53                          | 61.81  | 6.40(6.15) |

Device condition:

(1) chloroform (CF);

(2) concentration: ITO/PEDOT:PSS(5000 rpm, 140 °C 30min)/SM1:PC<sub>71</sub>BM (2000 rpm)/Ca (10 nm)/Al (100 nm)

(3) Solvent vapor annealing time: 20 s

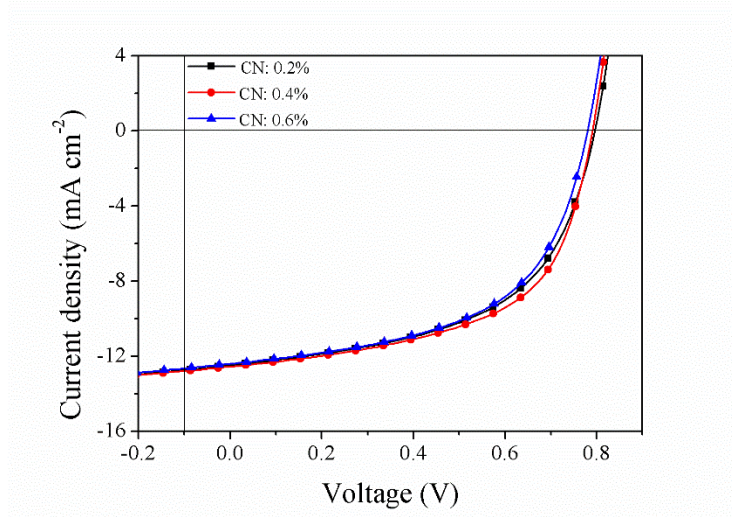

**Fig. S16.** *J-V* curve of the FBT(IID-T)<sub>2</sub>/PC<sub>71</sub>BM-based SM-OSCs under AM.1.5G illumination (100 mW/cm<sup>2</sup>) with CN ratios optimization.

**Table. S3.** *J-V* curve of the FBT(IID-T)<sub>2</sub>/PC<sub>71</sub>BM-based SM-OSCs under AM.1.5G illumination (100 mW/cm<sup>2</sup>) with CN ratios optimization.

| CN   | $V_{oc}$ (V) | $J_{sc}$ (mA/cm <sup>2</sup> ) | FF (%) | PCE (%)    |
|------|--------------|--------------------------------|--------|------------|
| 0.2% | 0.79         | 12.46                          | 54.91  | 5.41(5.14) |
| 0.4% | 0.79         | 12.54                          | 57.06  | 5.65(5.35) |
| 0.6% | 0.78         | 12.41                          | 54.85  | 5.31(5.05) |

Device condition:

(1) chloroform(CF);

(2) concentration: 10 mg/mL of FBT(IID-T)<sub>2</sub> in CF;

(3) Structure: ITO/PEDOT:PSS(5000 rpm, 140 °C 30min)/SM1:PC<sub>71</sub>BM (2000 rpm)/Ca (10 nm)/Al (100 nm).

(4) Spin-coating temperature: at room temperature.

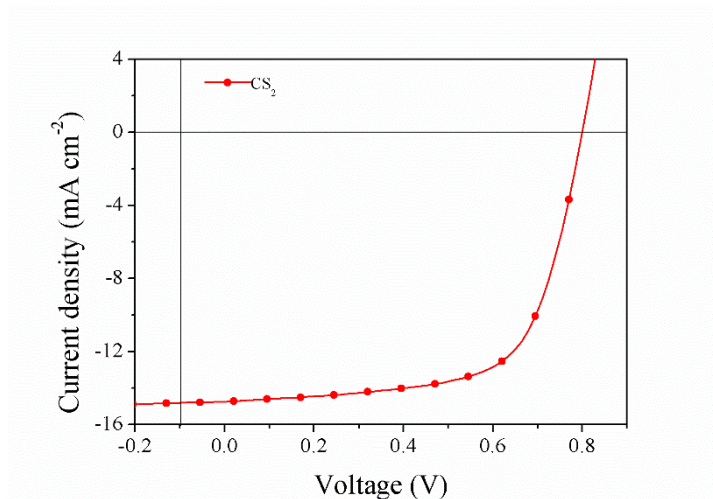

**Fig. S17.** *J-V* curve of the FBT(IID-T)<sub>2</sub>/PC<sub>71</sub>BM-based SM-OSCs under AM.1.5G illumination (100 mW/cm<sup>2</sup>) with CS<sub>2</sub> solvent annealing.

**Table. S4.** *J-V* curve of the FBT(IID-T)<sub>2</sub>/PC<sub>71</sub>BM-based SM-OSCs under AM.1.5G illumination (100 mW/cm<sup>2</sup>) with CS<sub>2</sub> solvent annealing.

| Solvent         | $V_{oc}$ (V) | $J_{sc}$ (mA/cm <sup>2</sup> ) | FF (%) | PCE (%)    |
|-----------------|--------------|--------------------------------|--------|------------|
| CS <sub>2</sub> | 0.785        | 14.74                          | 67.26  | 7.78(7.54) |

Device condition:

(1) chloroform (CF);

(2) concentration: ITO/PEDOT:PSS(5000 rpm, 140 °C

30min)/SM2:PC71BM (2000 rpm)/Ca (10 nm)/Al (100 nm)

(3) Solvent vapor annealing time: 20 s

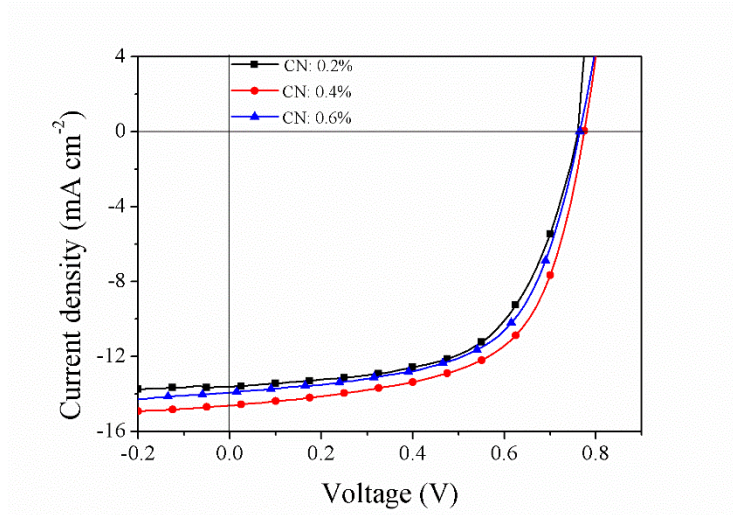

**Fig. S18.** *J-V* curve of the FBT(TDPP-T)<sub>2</sub>/PC<sub>71</sub>BM-based OSCs under AM.1.5G illumination (100 mW/cm<sup>2</sup>) with SM/PC<sub>71</sub>BM CN ratios optimization.

**Table. S5.** *J-V* curve of the FBT(TDPP-T)<sub>2</sub>/PC<sub>71</sub>BM-based SM-OSCs under AM.1.5G illumination (100 mW/cm<sup>2</sup>) with CN ratios optimization.

| CN   | $V_{oc}$ (V) | $J_{sc}$ (mA/cm <sup>2</sup> ) | FF (%) | PCE (%)    |
|------|--------------|--------------------------------|--------|------------|
| 0.2% | 0.76         | 13.61                          | 59.91  | 6.20(6.01) |
| 0.4% | 0.76         | 14.61                          | 61.75  | 6.86(6.51) |
| 0.6% | 0.75         | 13.93                          | 62.27  | 6.40(6.13) |

Device condition:

- (1) chloroform(CF);
- (2) concentration: 10 mg/mL of FBT(TDPP-T)<sub>2</sub> in CF;
- (3) Structure: ITO/PEDOT:PSS(5000 rpm, 140 °C 30min)/SM3:PC<sub>71</sub>BM (2000 rpm)/Ca (10 nm)/Al (100 nm).
- (4) Spin-coating temperature: at room temperature.



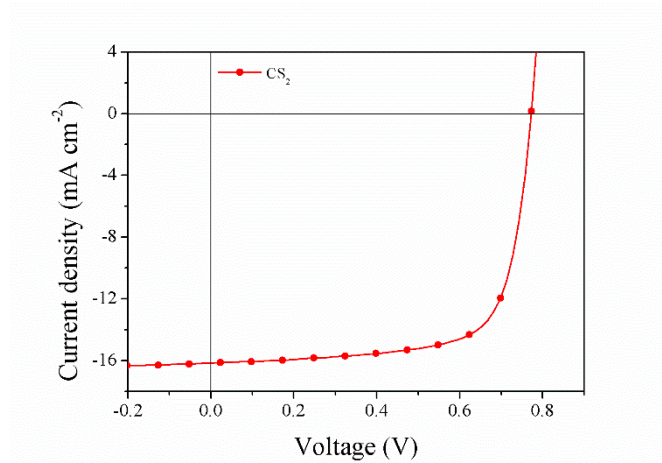

**Fig. S19.** *J-V* curve of the FBT(TDPP-T)<sub>2</sub>/PC<sub>71</sub>BM-based SM-OSCs under AM.1.5G illumination (100 mW/cm<sup>2</sup>) with CS<sub>2</sub> solvent annealing.

**Table. S6.** *J-V* curve of the FBT(TDPP-T)<sub>2</sub>/PC<sub>71</sub>BM-based SM-OSCs under AM.1.5G illumination (100 mW/cm<sup>2</sup>) with CS<sub>2</sub> solvent annealing.

| Solvent         | $V_{oc}$ (V) | $J_{sc}$ (mA/cm <sup>2</sup> ) | FF (%) | PCE (%)    |
|-----------------|--------------|--------------------------------|--------|------------|
| CS <sub>2</sub> | 0.758        | 16.14                          | 73.52  | 9.00(8.85) |

Device condition:

(1) chloroform (CF);

(2) concentration: ITO/PEDOT:PSS(5000 rpm, 140 °C 30min)/SM3:PC<sub>71</sub>BM (2000 rpm)/Ca (10 nm)/Al (100 nm)

(3) Solvent vapor annealing time: 20 s
